# Supplementary material
Source: PubMed Central journal article supplement (PMC8448998)
Supplement: mmc1.pdf [file mmc1.pdf]

## The Effect of a Quality Improvement Intervention on Sleep and Delirium in Critically Ill Patients in a Surgical ICU

*Joseph E. Tonna, MD; Anna Dalton, DNP; Angela P. Presson, PhD; Chong Zhang, MS; Elizabeth Colantuoni, PhD; Kirsten Lander, MSN, RN; Sullivan Howard, BS; Julia Beynon, MHI, BSN, RN; and Biren B. Kamdar, MD, MHS*

CHEST 2021; 160(3):899-908

*Online supplements are not copyedited prior to posting and the author(s) take full responsibility for the accuracy of all data.*

© 2021 AMERICAN COLLEGE OF CHEST PHYSICIANS. Reproduction of this article is prohibited without written permission from the American College of Chest Physicians. See online for more details. DOI: 10.1016/j.chest.2021.03.030

### **e-Appendix 1. Supplemental Methods**

1. Daily Sleep/Wake Intervention Bundle Checklist
2. SQUIRE Checklist
3. Protocol implementation and team members
3. Model Selection for Primary Outcome and Sensitivity Analyses
4. Data Sharing

### **Supplemental Results (e-Appendix 2)**

**e-Table 1.** Implementation of Sleep Quality Improvement Interventions

### **Sensitivity Analyses**

**e-Table 2.** Joint frailty model for ICU delirium and death/ICU discharge

**e-Table 3.** Adjusted risk of delirium, using all exposure days

**e-Table 4.** Adjusted risk of delirium, up to 7 days exposed

**e-Table 5.** Adjusted risk of delirium, up to 21 days

**e-Table 6.** Adjusted risk of delirium or coma within the first 14 days exposed

**e-Table 7.** Joint frailty model for ICU delirium or coma and death/ICU discharge

**e-Table 8.** Adjusted delirium risk within the first 14 days exposed, excluding non-operative patients

**e-Table 9.** Adjusted delirium risk within the first 14 days exposed, excluding avoidable coma

## e-Appendix 1. Supplemental Methods

### 1. Daily Sleep/Wake Intervention Bundle Checklist

| Text Section and Item Name      | Section or Item Description                                                                                                                                                                                                                                                                                                                                                                                                                                                                                                                                                | Location in Manuscript (Page) |
|---------------------------------|----------------------------------------------------------------------------------------------------------------------------------------------------------------------------------------------------------------------------------------------------------------------------------------------------------------------------------------------------------------------------------------------------------------------------------------------------------------------------------------------------------------------------------------------------------------------------|-------------------------------|
| <b>Title and Abstract</b>       |                                                                                                                                                                                                                                                                                                                                                                                                                                                                                                                                                                            |                               |
| 1. Title                        | Indicate that the manuscript concerns an initiative to improve healthcare (broadly defined to include the quality, safety, effectiveness, patient-centeredness, timeliness, cost, efficiency, and equity of healthcare)                                                                                                                                                                                                                                                                                                                                                    | Page 1                        |
| 2. Abstract                     | a. Provide adequate information to aid in searching and indexing<br>b. Summarize all key information from various sections of the text using the abstract format of the intended publication or a structured summary such as: background, local 2roject2, methods, interventions, results, conclusions                                                                                                                                                                                                                                                                     | Page 4                        |
| <b>Introduction</b>             | <b>Why did you start?</b>                                                                                                                                                                                                                                                                                                                                                                                                                                                                                                                                                  |                               |
| 3. Problem Description          | Nature and significance of the local problem                                                                                                                                                                                                                                                                                                                                                                                                                                                                                                                               | Page 5                        |
| 4. Available Knowledge          | Summary of what is currently known about the 2roject2, including relevant previous studies                                                                                                                                                                                                                                                                                                                                                                                                                                                                                 | Page 5                        |
| 5. Rationale                    | Informal or formal frameworks, models, concepts, and/or theories used to explain the 2roject2, any reasons or assumptions that were used to develop the intervention(s), and reasons why the intervention(s) was expected to work                                                                                                                                                                                                                                                                                                                                          | Page 6                        |
| 6. Specific Aims                | Purpose of the 2roject and of this report                                                                                                                                                                                                                                                                                                                                                                                                                                                                                                                                  | Page 5, 6                     |
| <b>Methods</b>                  | <b>What did you do?</b>                                                                                                                                                                                                                                                                                                                                                                                                                                                                                                                                                    |                               |
| 7. Context                      | Contextual elements considered important at the outset of introducing the intervention(s)                                                                                                                                                                                                                                                                                                                                                                                                                                                                                  | Pages 5, 6                    |
| 8. Intervention(s)              | a. Description of the intervention(s) in sufficient detail that others could reproduce it<br>b. Specifics of the team involved in the work                                                                                                                                                                                                                                                                                                                                                                                                                                 | Pages 6, 7, 8                 |
| 9. Study of the Intervention(s) | a. Approach chosen for assessing the impact of the intervention(s)<br>b. Approach used to establish whether the observed outcomes were due to the intervention(s)                                                                                                                                                                                                                                                                                                                                                                                                          | Pages 7, 8, Supplement        |
| 10. Measures                    | a. Measures chosen for studying processes and outcomes of the intervention(s), including rationale for choosing them, their operational definitions, and their validity and reliability<br>b. Description of the approach to the ongoing assessment of contextual elements that contributed to the success, failure, efficiency, and cost<br>c. Methods employed for assessing completeness and accuracy of data                                                                                                                                                           | Pages 7, 8                    |
| 11. Analysis                    | a. Qualitative and quantitative methods used to draw inferences from the data<br>b. Methods for understanding variation within the data, including the effects of time as a variable                                                                                                                                                                                                                                                                                                                                                                                       | Pages 8, 9, 10                |
| 12. Ethical Considerations      | Ethical aspects of implementing and studying the intervention(s) and how they were addressed, including, but not limited to, formal ethics review and potential 2roject2o(s) of interest                                                                                                                                                                                                                                                                                                                                                                                   | Page 7                        |
| <b>Results</b>                  | <b>What did you find?</b>                                                                                                                                                                                                                                                                                                                                                                                                                                                                                                                                                  |                               |
| 13. Results                     | a. Initial steps of the intervention(s) and their evolution over time (e.g., time-line diagram, flow chart, or table), including modifications made to the intervention during the 2roject<br>b. Details of the process measures and outcome<br>c. Contextual elements that interacted with the intervention(s)<br>d. Observed associations between outcomes, interventions, and relevant contextual elements<br>e. Unintended consequences such as unexpected benefits, problems, failures, or costs associated with the intervention(s)<br>f. Details about missing data | Pages 10, 11, 12              |
| <b>Discussion</b>               | <b>What does it mean?</b>                                                                                                                                                                                                                                                                                                                                                                                                                                                                                                                                                  |                               |
| 14. Summary                     | a. Key findings, including relevance to the rationale and specific aims<br>b. Particular strengths of the project                                                                                                                                                                                                                                                                                                                                                                                                                                                          | Page 12-15                    |

## 2. SQUIRE Checklist

| Text Section and Item Name      | Section or Item Description                                                                                                                                                                                                                                                                                                                                                                                                                                                                                                                                                | Location in Manuscript (Page) |
|---------------------------------|----------------------------------------------------------------------------------------------------------------------------------------------------------------------------------------------------------------------------------------------------------------------------------------------------------------------------------------------------------------------------------------------------------------------------------------------------------------------------------------------------------------------------------------------------------------------------|-------------------------------|
| <b>Title and Abstract</b>       |                                                                                                                                                                                                                                                                                                                                                                                                                                                                                                                                                                            |                               |
| 1. Title                        | Indicate that the manuscript concerns an initiative to improve healthcare (broadly defined to include the quality, safety, effectiveness, patient- centeredness, timeliness, cost, efficiency, and equity of healthcare)                                                                                                                                                                                                                                                                                                                                                   | Page 1                        |
| 2. Abstract                     | c. Provide adequate information to aid in searching and indexing<br>d. Summarize all key information from various sections of the text using the abstract format of the intended publication or a structured summary such as: background, local problem, methods, interventions, results, conclusions                                                                                                                                                                                                                                                                      | Page 4                        |
| <b>Introduction</b>             |                                                                                                                                                                                                                                                                                                                                                                                                                                                                                                                                                                            |                               |
| <b>Why did you start?</b>       |                                                                                                                                                                                                                                                                                                                                                                                                                                                                                                                                                                            |                               |
| 3. Problem Description          | Nature and significance of the local problem                                                                                                                                                                                                                                                                                                                                                                                                                                                                                                                               | Page 5                        |
| 4. Available Knowledge          | Summary of what is currently known about the problem, including relevant previous studies                                                                                                                                                                                                                                                                                                                                                                                                                                                                                  | Page 5                        |
| 5. Rationale                    | Informal or formal frameworks, models, concepts, and/or theories used to explain the problem, any reasons or assumptions that were used to develop the intervention(s), and reasons why the intervention(s) was expected to work                                                                                                                                                                                                                                                                                                                                           | Page 6                        |
| 6. Specific Aims                | Purpose of the project and of this report                                                                                                                                                                                                                                                                                                                                                                                                                                                                                                                                  | Page 5, 6                     |
| <b>Methods</b>                  |                                                                                                                                                                                                                                                                                                                                                                                                                                                                                                                                                                            |                               |
| <b>What did you do?</b>         |                                                                                                                                                                                                                                                                                                                                                                                                                                                                                                                                                                            |                               |
| 7. Context                      | Contextual elements considered important at the outset of introducing the intervention(s)                                                                                                                                                                                                                                                                                                                                                                                                                                                                                  | Pages 5, 6                    |
| 8. Intervention(s)              | a. Description of the intervention(s) in sufficient detail that others could reproduce it<br>b. Specifics of the team involved in the work                                                                                                                                                                                                                                                                                                                                                                                                                                 | Pages 6, 7, 8                 |
| 9. Study of the Intervention(s) | a. Approach chosen for assessing the impact of the intervention(s)<br>b. Approach used to establish whether the observed outcomes were due to the intervention(s)                                                                                                                                                                                                                                                                                                                                                                                                          | Pages 7, 8, Supplement        |
| 10. Measures                    | d. Measures chosen for studying processes and outcomes of the intervention(s), including rationale for choosing them, their operational definitions, and their validity and reliability<br>e. Description of the approach to the ongoing assessment of contextual elements that contributed to the success, failure, efficiency, and cost<br>f. Methods employed for assessing completeness and accuracy of data                                                                                                                                                           | Pages 7, 8                    |
| 11. Analysis                    | a. Qualitative and quantitative methods used to draw inferences from the data<br>b. Methods for understanding variation within the data, including the effects of time as a variable                                                                                                                                                                                                                                                                                                                                                                                       | Pages 8, 9, 10                |
| 12. Ethical Considerations      | Ethical aspects of implementing and studying the intervention(s) and how they were addressed, including, but not limited to, formal ethics review and potential conflict(s) of interest                                                                                                                                                                                                                                                                                                                                                                                    | Page 7                        |
| <b>Results</b>                  |                                                                                                                                                                                                                                                                                                                                                                                                                                                                                                                                                                            |                               |
| <b>What did you find?</b>       |                                                                                                                                                                                                                                                                                                                                                                                                                                                                                                                                                                            |                               |
| 13. Results                     | g. Initial steps of the intervention(s) and their evolution over time (e.g., time-line diagram, flow chart, or table), including modifications made to the intervention during the project<br>h. Details of the process measures and outcome<br>i. Contextual elements that interacted with the intervention(s)<br>j. Observed associations between outcomes, interventions, and relevant contextual elements<br>k. Unintended consequences such as unexpected benefits, problems, failures, or costs associated with the intervention(s)<br>l. Details about missing data | Pages 10, 11, 12              |
| <b>Discussion</b>               |                                                                                                                                                                                                                                                                                                                                                                                                                                                                                                                                                                            |                               |
| <b>What does it mean?</b>       |                                                                                                                                                                                                                                                                                                                                                                                                                                                                                                                                                                            |                               |
| 14. Summary                     | a. Key findings, including relevance to the rationale and specific aims<br>b. Particular strengths of the project                                                                                                                                                                                                                                                                                                                                                                                                                                                          | Page 12-15                    |

### **3. Sleep quality improvement intervention implementation**

The sleep quality improvement (QI) intervention was modeled from a previous published effort.<sup>1</sup> The ICU sleep QI team was led by one physician (JET) and one nurse practitioner student (AD), who was a senior nurse within the CVICU. Additionally, the team consisted of a nurse director who previously was a senior nurse in the SICU (JB), and 6 additional sleep champions from the two ICUs. Sleep champions included experienced nurses and aids. The team was advised by a delirium QI expert (BK).

The team began meeting and planning study implementation >12 months prior to QI start. First, modifications to the previously published effort were made based on identification of barriers to sleep identified through a Plan-Do-Study-Act (PDSA) process.<sup>2</sup> As the 2018 Pain, Agitation/Sedation, Delirium, Immobility, and Sleep (PADIS) had not yet been published,<sup>3</sup> we collaborated with an ICU sleep expert (BK) who provided detailed input and feedback on candidate interventions. Based on prior sleep and delirium efforts, a bundled approach was adopted to facilitate the delivery of multiple similar interventions (i.e., turning off lights and televisions) simultaneously. The PDSA process was vital for fine-tuning non-pharmacological interventions, for example in identifying that baths and room restocking were occurring at night and should be conducted during daytime hours. The PDSA process was also used to evaluate ICU medications often prescribed for sleep. As prior interventions demonstrated that melatonin, trazodone, antipsychotics, propofol, and opiates were often given to patients for sleep, our effort involved gathering information regarding use of these common ICU medications. As candidate interventions were identified, they were evaluated for feasibility via conversations with ICU nurses, senior aids and physicians.

Once data collection began, fliers to introduce the QI intervention were distributed throughout the unit. The QI intervention involved demonstrating an interest in ICU patients' sleep quality without introducing best practices for sleep or encouraging behavior modification. Over the weekend preceding intervention implementation, the study team held lunchtime and evening education sessions for staff in both ICUs to introduce the idea of improving the sleep environment. During these meetings the QI checklist was introduced. At the start of the intervention, emails went out to all ICU staff and physicians to introduce the QI intervention and asynchronously provide educational materials. Additional emails were sent from nursing managers and medical directors of each ICU.

To facilitate intervention implementation, a prompting checklist was provided to all staff providing recommendations with specific interventions to facilitate sleep. Throughout the intervention period, sleep champions arrived early for most day shifts (7-8am) in order to talk to night shift nurses about overnight issues that prevented successful implementation of sleep interventions, to encourage completion of forms, and bring feedback to the team. During the intervention period, the sleep QI team held weekly meetings and frequent informal meetings to discuss barriers to implementation, feedback, and review completion rates of interventions and forms. The sleep QI effort was also discussed at weekly interdisciplinary conferences for each Unit along with monthly nurse education sessions.

#### 4. Model Selection

##### a. Primary Outcome: Pre- versus Post-Intervention Delirium

Delirium rate was summarized for each patient for their first admission. Secondary analyses, including the joint modeling and sensitivity analyses, were at the admission level. Among 646 patients, there were 720 encounters, of which 705 contained at least one day with a delirium assessment. Fourteen encounters involved inter-unit transfers and were adjudicated with manual chart review and assigned to "CVICU." As missing data was minimal, we used case-wise deletion for our multivariable model, yielding 695 encounters for inclusion in our multivariable model.

The primary outcome was the percentage of ICU days patients experienced at least one delirium episode, out of the total days with a delirium assessment (exposure days, i.e. days with delirium divided by total ICU days delirium assessed), up to 14 days. Absolute days with delirium is reported in **Table 2**. Encounters with more than 14 exposure days were truncated after day 14. As described in the main text, we used a simple multivariable linear regression model to estimate the absolute difference in the mean percentage of days with delirium comparing the post- and pre-intervention period, with and without adjustment for *a priori* specified patient characteristics. While binomial regression is more common for modelling these types of data, this approach would counter our goal of weighing each encounter equally regardless of length of ICU stay, a variable that could potentially be associated with delirium status.

Due to a skewed outcome distribution, 95% confidence intervals for the unadjusted and adjusted absolute difference were estimated using a bootstrap procedure based on sampling the patients with replacement 2,000 times and computing the bias-corrected and accelerated 95% confidence interval (BCa CIs). P-values came from a generalized estimating equations (GEE) model under an independence correlation structure with robust Huber-White sandwich standard errors to account for variance across subjects (heteroscedasticity).<sup>4,5</sup>

##### b. Sensitivity Analysis: Joint Frailty Model for Delirium

Delirium was also modeled as a recurrent event using a joint frailty model, where termination of exposure by either death or ICU discharge was modeled simultaneously (terminal event), as has been advocated for assessment ICU delirium.<sup>6</sup> For each day with delirium assessment (exposure day), if at least one assessment was positive, then that day was recorded as an event. Days with no assessment were considered non-exposure days and were excluded, and for each encounter, the patient was observed until death or discharge from the ICU, or was censored after 14 assessment days. For encounters with recurrent and terminal event on the same day, the death/discharge event was moved to the next half day, as we assumed the patient experienced delirium before death/discharge. Covariates were included if they were associated with the outcome in univariate analysis below the level of 0.1. Hazard functions were assumed to follow a Weibull distribution. These analyses were conducted using the R *frailtypack* package.<sup>7</sup>

# CHEST<sup>®</sup> Online Supplement

## **5. Data Sharing**

To facilitate research reproducibility, replicability, accuracy and transparency, the datasets generated and/or analyzed during the current study, and the associated analytic code, will be made available indefinitely, following publication, to anyone who wishes to access the data for analysis, on the Open Science Foundation<sup>8</sup> (OSF) repository, DOI 10.17605/OSF.IO/27RSP at [<https://osf.io/27rsp>]. Data were de-identified in accordance with Section 164.514 of the Health Insurance Portability and Accountability Act (HIPAA).

## e-Appendix 2. Supplemental Results

| <b>e-Table 1. Implementation of Sleep Quality Improvement Interventions</b> | <b>N=932 patient day/nights<sup>a</sup></b> |
|-----------------------------------------------------------------------------|---------------------------------------------|
| <b>Variable</b>                                                             |                                             |
| Blinds raised                                                               | 797 (93%) <sup>b</sup>                      |
| Caffeine avoided after 3pm                                                  | 497 (59%)                                   |
| Less than 50% of day shift spent napping                                    | 496 (70%)                                   |
| Room lights dimmed                                                          | 851 (93%)                                   |
| Room curtain closed                                                         | 845 (93%)                                   |
| Warm bath before 10pm                                                       | 564 (63%)                                   |
| Unnecessary alarms prevented                                                | 874 (96%)                                   |
| Room temperature optimized                                                  | 888 (98%)                                   |
| Pain appropriately contained                                                | 831 (92%)                                   |
| Television off                                                              | 696 (77%)                                   |
| <u>Estimated number of nurse interruptions between 10pm-7am</u>             |                                             |
| 0-5                                                                         | 239 (47%)                                   |
| 6-10                                                                        | 185 (37%)                                   |
| >10                                                                         | 81 (16%)                                    |
| Eye masks offered and accepted                                              | 19 (2%)                                     |
| Earplugs offered and accepted                                               | 22 (3%)                                     |
| Hallway lights dimmed                                                       | 884 (99%)                                   |
| Effort to decrease noise                                                    | 800 (93%)                                   |
| Eyeglasses, hearing aids applied                                            | 346 (40%)                                   |
| Mobility / upright chair position daily                                     | 495 (58%)                                   |
| Minimize RN interruptions after 22:00                                       | 765 (86%)                                   |
| <u>Medication given for sleep</u>                                           |                                             |
| <i>hydromorphone</i>                                                        | 1 (0.1%)                                    |
| <i>fentanyl</i>                                                             | 10 (1%)                                     |
| <i>oxycodone</i>                                                            | 13 (1%)                                     |
| <i>haloperidol</i>                                                          | 10 (1%)                                     |
| <i>quetiapine</i>                                                           | 48 (5%)                                     |
| <i>propofol</i>                                                             | 11 (1%)                                     |
| <i>melatonin</i>                                                            | 147 (16%)                                   |
| Nurse station quiet                                                         | 867 (97%)                                   |
| Stop sign placed on patient's door                                          | 823 (93%)                                   |

<sup>a</sup> Per filtering, excludes data from washout period and from patients who overlapped periods

<sup>b</sup> Checklist items were considered negative if not filled out.



### Sensitivity Analysis

| <b>e-Table 2. Joint Frailty Model for ICU Delirium and Death/ICU discharge<sup>a</sup></b> |                              |                |
|--------------------------------------------------------------------------------------------|------------------------------|----------------|
| <b>Variable</b>                                                                            | <b>Hazard Ratio (95% CI)</b> | <b>P value</b> |
| <b>Delirium</b>                                                                            |                              |                |
| Intervention vs. Pre-Intervention                                                          | 0.79 (0.62 to 0.99)          | 0.043          |
| SICU vs. CVICU                                                                             | 2.50 (1.09 to 5.72)          | 0.030          |
| Admission Category vs. Cardiology                                                          |                              |                |
| Trauma/General Surgery                                                                     | 0.79 (0.33 to 1.88)          | 0.60           |
| Cardiothoracic Surgery                                                                     | 1.62 (1.13 to 2.31)          | 0.008          |
| Coma at first ICU assessment vs. None                                                      | 2.06 (1.57 to 2.71)          | <0.001         |
| <b>Death or ICU discharge</b>                                                              |                              |                |
| Intervention vs. Pre-Intervention                                                          | 0.90 (0.74 to 1.09)          | 0.26           |
| Age, per year                                                                              | 1.11 (1.01 to 1.22)          | 0.033          |
| Charlson Comorbidity Index, per point                                                      | 0.85 (0.76 to 0.94)          | 0.002          |
| Admission Category vs. Cardiology                                                          |                              |                |
| Trauma / General Surgery                                                                   | 1.07 (0.83 to 1.39)          | 0.59           |
| Cardiothoracic Surgery                                                                     | 0.73 (0.56 to 0.96)          | 0.026          |
| Coma at first ICU assessment vs. None                                                      | 0.71 (0.55 to 0.91)          | 0.007          |

Abbreviations: ICU = intensive care unit, CI = confidence interval, SICU = surgical intensive care unit, CVICU = cardiovascular intensive care unit

<sup>a</sup> For each day with delirium assessment (exposure day), if at least one assessment was positive, then that day was recorded as an event. Delirium modeled as a recurrent event, with termination of exposure by death or ICU discharge modeled simultaneously (terminal event). Days with no assessment were considered non-exposure days and were excluded, and for each encounter, the patient was observed until death or discharge from the ICU, or was censored after 14 assessment days. For encounters with recurrent and terminal event on the same day, the death/discharge event was moved to the next half day, as we assumed the patient experienced delirium before death/discharge. Covariates were included if they were associated with the outcome in univariate analysis below the level of 0.1. Hazard functions were assumed to follow a Weibull distribution.

**e-Table 3. Adjusted risk of delirium, using all exposure days<sup>a</sup>**

| <b>Variable</b>                               | <b>Coefficients (95% CI)</b> | <b>P-value</b> | <b>Bootstrap CI</b>  |
|-----------------------------------------------|------------------------------|----------------|----------------------|
| Intervention vs. Pre-Intervention             | -4.7% (-8.8 to -0.5)         | 0.03           | -4.7% (-9.0 to -0.8) |
| Age, per year                                 | 0.2% (0.0 to 0.3)            | 0.01           |                      |
| Female vs. Male Sex                           | 1.7% (-2.7 to 6.0)           | 0.46           |                      |
| Other vs. White Race                          | 6.4% (0.2 to 12.5)           | 0.04           |                      |
| Charlson Comorbidity Index, per point         | 0.6% (-0.2 to 1.4)           | 0.11           |                      |
| Home sleep medication, Yes vs. No             | -2.8% (-7.4 to 1.8)          | 0.23           |                      |
| SICU vs. CVICU                                | 3.1% (-7.6 to 13.8)          | 0.57           |                      |
| Admission category vs. General/Trauma Surgery |                              |                |                      |
| Cardiology                                    | -6.1% (-16.8 to -4.6)        | 0.26           |                      |
| Cardiothoracic Surgery                        | -3.3% (-14.0 to 7.4)         | 0.55           |                      |
| Coma at first ICU assessment vs. None         | 20.6% (13.7 to 27.5)         | <0.001         |                      |

Abbreviations: CCI = Charlson Comorbidity Index, SICU = surgical intensive care unit, ICU = intensive care unit, CVICU = cardiovascular intensive care unit

<sup>a</sup> Values represent percentage of days with a positive delirium assessment during an admission, among all days of the ICU stay that delirium was assessed. *P* values calculated using linear regression with generalized estimating equations (GEE) under an independence correlation structure and with robust Huber-White sandwich standard errors to account for variance across subjects (heteroscedasticity). 95% confidence intervals estimated using bootstrap percentile method with 2,000 samples. Delirium percentage data missing for 7 (2%) and 8 (2%) of pre-intervention and intervention patients, respectively.

**e-Table 4. Adjusted risk of delirium, up to 7 days exposed<sup>a</sup>**

| <b>Variable</b>                               | <b>Coefficients (95% CI)</b> | <b>P-value</b> | <b>Bootstrap CI</b>  |
|-----------------------------------------------|------------------------------|----------------|----------------------|
| Intervention vs. Pre-Intervention             | -4.9% (-9.3 to -0.6)         | 0.03           | -4.9% (-9.3 to -0.5) |
| Age, per year                                 | 0.1% (0.0 to 0.3)            | 0.046          |                      |
| Female vs. Male Sex                           | 2.5% (-2.1 to -7.0)          | 0.29           |                      |
| Other vs. White Race                          | 7.7% (1.2 to 14.1)           | 0.02           |                      |
| Charlson Comorbidity Index, per point         | 0.8% (0.0 to 1.6)            | 0.07           |                      |
| Home sleep medication, Yes vs. No             | -2.3% (-7.2 to 2.6)          | 0.36           |                      |
| SICU vs. CVICU                                | 3.4% (-7.2 to 14.0)          | 0.53           |                      |
| Admission category vs. General/Trauma Surgery |                              |                |                      |
| Cardiology                                    | -7.4% (-18.0 to 3.2)         | 0.17           |                      |
| Cardiothoracic Surgery                        | -2.9% (-13.6 to 7.7)         | 0.59           |                      |
| Coma at first ICU assessment vs. None         | 23.3% (15.9 to 30.7)         | <0.001         |                      |

Abbreviations: CCI = Charlson Comorbidity Index, SICU = surgical intensive care unit, ICU = intensive care unit, CVICU = cardiovascular intensive care unit

<sup>a</sup> Values represent percentage of days with a positive delirium assessment during an admission, among the first 7 days of the ICU stay that delirium was assessed. *P* values calculated using linear regression with generalized estimating equations (GEE) under an independence correlation structure and with robust Huber-White sandwich standard errors to account for variance across subjects (heteroscedasticity). 95% confidence intervals estimated using bootstrap percentile method with 2,000 samples. Delirium percentage data missing for 7 (2%) and 8 (2%) of pre-intervention and intervention patients, respectively.

**e-Table 5. Adjusted risk of delirium, up to 21 days exposed<sup>a</sup>**

| <b>Variable</b>                               | <b>Coefficients (95% CI)</b> | <b>P-value</b> | <b>Bootstrap CI</b>  |
|-----------------------------------------------|------------------------------|----------------|----------------------|
| Intervention vs. Pre-Intervention             | -4.7% (-8.9 to -0.6)         | 0.03           | -4.7% (-8.8 to -0.7) |
| Age, per year                                 | 0.2% (0.0 to 0.3)            | 0.02           |                      |
| Female vs. Male Sex                           | 1.8% (-2.6 to 6.2)           | 0.42           |                      |
| Other vs. White Race                          | 6.7% (0.5 to 13.0)           | 0.04           |                      |
| Charlson Comorbidity Index, per point         | 0.7% (-0.1 to 1.5)           | 0.11           |                      |
| Home sleep medication, Yes vs. No             | -2.8% (-7.4 to 1.8)          | 0.23           |                      |
| SICU vs. CVICU                                | 3.0% (-7.7 to 13.7)          | 0.58           |                      |
| Admission category vs. General/Trauma Surgery |                              |                |                      |
| Cardiology                                    | -6.3% (-17.0 to 4.4)         | 0.25           |                      |
| Cardiothoracic Surgery                        | -3.0% (-13.7 to 7.8)         | 0.59           |                      |
| Coma at first ICU assessment vs. None         | 21.0% (13.9 to 27.9)         | <0.001         |                      |

Abbreviations: CCI = Charlson Comorbidity Index, SICU = surgical intensive care unit, ICU = intensive care unit, CVICU = cardiovascular intensive care unit

<sup>a</sup> Values represent percentage of days with a positive delirium assessment during an admission, among the first 21 days of the ICU stay that delirium was assessed. *P* values calculated using linear regression with generalized estimating equations (GEE) under an independence correlation structure and with robust Huber-White sandwich standard errors to account for variance across subjects (heteroscedasticity). 95% confidence intervals estimated using bootstrap percentile method with 2,000 samples. Delirium percentage data missing for 7 (2%) and 8 (2%) of pre-intervention and intervention patients, respectively.

**e-Table 6. Adjusted risk of delirium or coma, up to 14 days exposed<sup>a</sup>**

| <b>Variable</b>                               | <b>Coefficients (95% CI)</b> | <b>P-value</b> | <b>Bootstrap CI</b>  |
|-----------------------------------------------|------------------------------|----------------|----------------------|
| Intervention vs. Pre-Intervention             | -5.4% (-9.5 to -1.4)         | 0.001          | -5.4% (-9.3 to -1.2) |
| Age, per year                                 | 0.1% (0.0 to 0.2)            | 0.15           |                      |
| Female vs. Male Sex                           | 1.0% (-3.3 to 5.2)           | 0.65           |                      |
| Other vs. White Race                          | 6.8% (0.8 to 12.9)           | 0.03           |                      |
| Charlson Comorbidity Index, per point         | 0.8% (0.0 to 1.6)            | 0.04           |                      |
| Home sleep medication, Yes vs. No             | -4.0% (-8.6 to 0.7)          | 0.09           |                      |
| SICU vs. CVICU                                | 2.7% (-7.4 to 12.8)          | 0.60           |                      |
| Admission category vs. General/Trauma Surgery |                              |                |                      |
| Cardiology                                    | -6.9% (-17.0 to 3.3)         | 0.19           |                      |
| Cardiothoracic Surgery                        | -3.9% (-14.0 to 6.2)         | 0.45           |                      |
| Coma at first ICU assessment vs. None         | 42.9% (37.1 to 48.7)         | <0.001         |                      |

Abbreviations: CCI = Charlson Comorbidity Index, SICU = surgical intensive care unit, ICU = intensive care unit, CVICU = cardiovascular intensive care unit

<sup>a</sup> Values represent percentage of days with a positive delirium or coma assessment during an admission, among the first 7 days of the ICU stay that delirium/coma were assessed. *P* values calculated using linear regression with generalized estimating equations (GEE) under an independence correlation structure and with robust Huber-White sandwich standard errors to account for variance across subjects (heteroscedasticity). 95% confidence intervals estimated using bootstrap percentile method with 2,000 samples. Delirium/Coma percentage data missing for 2 (1%) and 2 (1%) of pre-intervention and intervention patients, respectively.

**e-Table 7. Joint frailty model for ICU delirium *or* coma and death/ICU discharge<sup>a</sup>**

| <b>Variable</b>                       | <b>Hazard Ratio (95% CI)</b> | <b>P value</b> |
|---------------------------------------|------------------------------|----------------|
| <b>Delirium</b>                       |                              |                |
| Intervention vs. Pre-Intervention     | 0.83 (0.68 to 1.01)          | 0.06           |
| SICU vs. CVICU                        | 2.28 (1.10 to 4.73)          | 0.03           |
| Admission Category vs. Cardiology     |                              |                |
| Trauma/General Surgery                | 0.73 (0.34 to 1.56)          | 0.42           |
| Cardiothoracic Surgery                | 1.43 (1.06 to 1.91)          | 0.02           |
| Coma at first ICU assessment vs. None | 3.25 (2.57 to 4.10)          | <0.001         |
| <b>Death or ICU discharge</b>         |                              |                |
| Intervention vs. Pre-Intervention     | 0.92 (0.76 to 1.11)          | 0.38           |
| Age, per year                         | 1.11 (1.01 to 1.22)          | 0.04           |
| Charlson Comorbidity Index, per point | 0.84 (0.75 to 0.93)          | <0.001         |
| Admission Category vs. Cardiology     |                              |                |
| Trauma / General Surgery              | 1.08 (0.83 to 1.40)          | 0.57           |
| Cardiothoracic Surgery                | 0.74 (0.56 to 0.97)          | 0.03           |
| Coma at first ICU assessment vs. None | 0.54 (0.41 to 0.72)          | <0.001         |

Abbreviations: ICU = intensive care unit, CI = confidence interval, SICU = surgical intensive care unit, CVICU = cardiovascular intensive care unit

<sup>a</sup> For each day with delirium assessment (exposure day), if at least one assessment was positive, then that day was recorded as an event. Delirium modeled as a recurrent event, with termination of exposure by death or ICU discharge modeled simultaneously (terminal event). Days with no assessment were considered non-exposure days and were excluded, and for each encounter, the patient was observed until death or discharge from the ICU, or was censored after 14 assessment days. For encounters with recurrent and terminal event on the same day, the death/discharge event was moved to the next half day, as we assumed the patient experienced delirium before death/discharge. Covariates were included if they were associated with the outcome in univariate analysis below the level of 0.1. Hazard functions were assumed to follow a Weibull distribution.

**e-Table 8. Adjusted risk of delirium within the first 14 days exposed, excluding non-operative patients<sup>a,b</sup>**

| Variable                                      | Coefficients (95% CI) | P-value | Bootstrap CI          |
|-----------------------------------------------|-----------------------|---------|-----------------------|
| Intervention vs. Pre-Intervention             | -5.6% (-10.5 to -0.7) | 0.03    | -5.6% (-10.5 to -1.0) |
| Age, per year                                 | 0.1% (0.0 to 0.3)     | 0.10    |                       |
| Female vs. Male Sex                           | 2.5% (-2.6 to 7.7)    | 0.33    |                       |
| Other vs. White Race                          | 5.2% (-2.1 to 12.4)   | 0.16    |                       |
| Charlson Comorbidity Index, per point         | 0.4% (-0.6 to 1.4)    | 0.44    |                       |
| Home sleep medication, Yes vs. No             | -2.5% (-8.1 to 3.1)   | 0.39    |                       |
| SICU vs. CVICU                                | 4.1% (-6.9 to 15.0)   | 0.47    |                       |
| Admission category vs. General/Trauma Surgery |                       |         |                       |
| Cardiothoracic Surgery                        | -1.6% (-12.5 to 9.2)  | 0.77    |                       |
| Coma at first ICU assessment vs. None         | 20.6% (13.2 to 28.1)  | <0.001  |                       |

Abbreviations: CCI = Charlson Comorbidity Index, SICU = surgical intensive care unit, ICU = intensive care unit, CVICU = cardiovascular intensive care unit

<sup>a</sup> Excluding cardiology patients who underwent invasive but non-surgical procedures necessitating ICU admission (i.e., coronary catheterization, intra-aortic balloon pump placement)

<sup>b</sup> Values represent percentage of days with a positive delirium assessment during an admission, among the first 14 days of the ICU stay that delirium was assessed. *P* values calculated using linear regression with generalized estimating equations (GEE) under an independence correlation structure and with robust Huber-White sandwich standard errors to account for variance across subjects (heteroscedasticity). 95% confidence intervals estimated using bootstrap percentile method with 2,000 samples.

**e-Table 9. Adjusted risk of delirium, within the first 14 days exposed, excluding avoidable coma<sup>a,b</sup>**

| Variable                                      | Coefficients (95% CI) | P-value | Bootstrap CI         |
|-----------------------------------------------|-----------------------|---------|----------------------|
| Intervention vs. Pre-Intervention             | -4.8% (-9.0 to -0.6)  | 0.03    | -4.8% (-9.1 to -0.8) |
| Age, per year                                 | 0.1% (0.0 to 0.3)     | 0.04    |                      |
| Female vs. Male Sex                           | 2.3% (-2.1 to 6.7)    | 0.30    |                      |
| Other vs. White Race                          | 6.3% (0.1 to 12.5)    | 0.048   |                      |
| Charlson Comorbidity Index, per point         | 0.7% (-0.1 to 1.5)    | 0.08    |                      |
| Home sleep medication, Yes vs. No             | -2.4% (-7.1 to 2.3)   | 0.32    |                      |
| SICU vs. CVICU                                | 3.5% (-6.8 to 13.9)   | 0.50    |                      |
| Admission category vs. General/Trauma Surgery |                       |         |                      |
| Cardiology                                    | -7.1% (-17.4 to 3.2)  | 0.18    |                      |
| Cardiothoracic Surgery                        | -2.4% (-12.7 to 8.0)  | 0.66    |                      |
| Coma at first ICU assessment vs. None         | 19.6% (12.5 to 26.7)  | <0.001  |                      |

Abbreviations: CCI = Charlson Comorbidity Index, SICU = surgical intensive care unit, ICU = intensive care unit, CVICU = cardiovascular intensive care unit

<sup>a</sup> Excluding patients with coma on first ICU assessment who then achieved a SAS  $\geq 2$  during the first 48 hours of ICU

<sup>b</sup> Values represent percentage of days with a positive delirium assessment during an admission, among the first 14 days of the ICU stay that delirium was assessed. *P* values calculated using linear regression with generalized estimating equations (GEE) under an independence correlation structure and with robust Huber-White sandwich standard errors to account for variance across subjects (heteroscedasticity). 95% confidence intervals estimated using bootstrap percentile method with 2,000 samples.



## REFERENCES

1. Kamdar BB, King LM, Collop NA, et al. The Effect of a Quality Improvement Intervention on Perceived Sleep Quality and Cognition in a Medical ICU\*. *Critical Care Medicine*. 2013;41(3):800-809.
2. Kamdar BB, Yang J, King LM, et al. Developing, Implementing, and Evaluating a Multifaceted Quality Improvement Intervention to Promote Sleep in an ICU. *American Journal of Medical Quality*. 2013;29(6):546-554.
3. Devlin JW, Skrobik Y, Gelinas C, et al. Clinical Practice Guidelines for the Prevention and Management of Pain, Agitation/Sedation, Delirium, Immobility, and Sleep Disruption in Adult Patients in the ICU. *Crit Care Med*. 2018;46(9):e825-e873.
4. Huber PJ. The behavior of maximum likelihood estimates under nonstandard conditions. Paper presented at: Proceedings of the fifth Berkeley symposium on mathematical statistics and probability 1967.
5. White H. A heteroskedasticity-consistent covariance matrix estimator and a direct test for heteroskedasticity. *Econometrica*. 1980:817-838.
6. Colantuoni E, Dinglas VD, Ely EW, Hopkins RO, Needham DM. Statistical methods for evaluating delirium in the ICU. *The Lancet Respiratory Medicine*. 2016;4(7):534-536.
7. Rondeau V, Marzroui Y, Gonzalez JR. frailtypack: An R Package for the Analysis of Correlated Survival Data with Frailty Models Using Penalized Likelihood Estimation or Parametrical Estimation. *2012*. 2012;47(4):28.
8. Foster ED, Deardorff A. Open Science Framework (OSF). *Journal of the Medical Library Association : JMLA*. 2017;105(2):203-206.
